# Supplementary material for: Evolution of Epileptiform Activity in Zebrafish by Statistical-Based Integration of Electrophysiology and 2-Photon Ca2+ Imaging
Source: MDPI journal article supplement (doi:10.3390/cells9030769), 2020-03-21
Supplement: s1 [file s1]

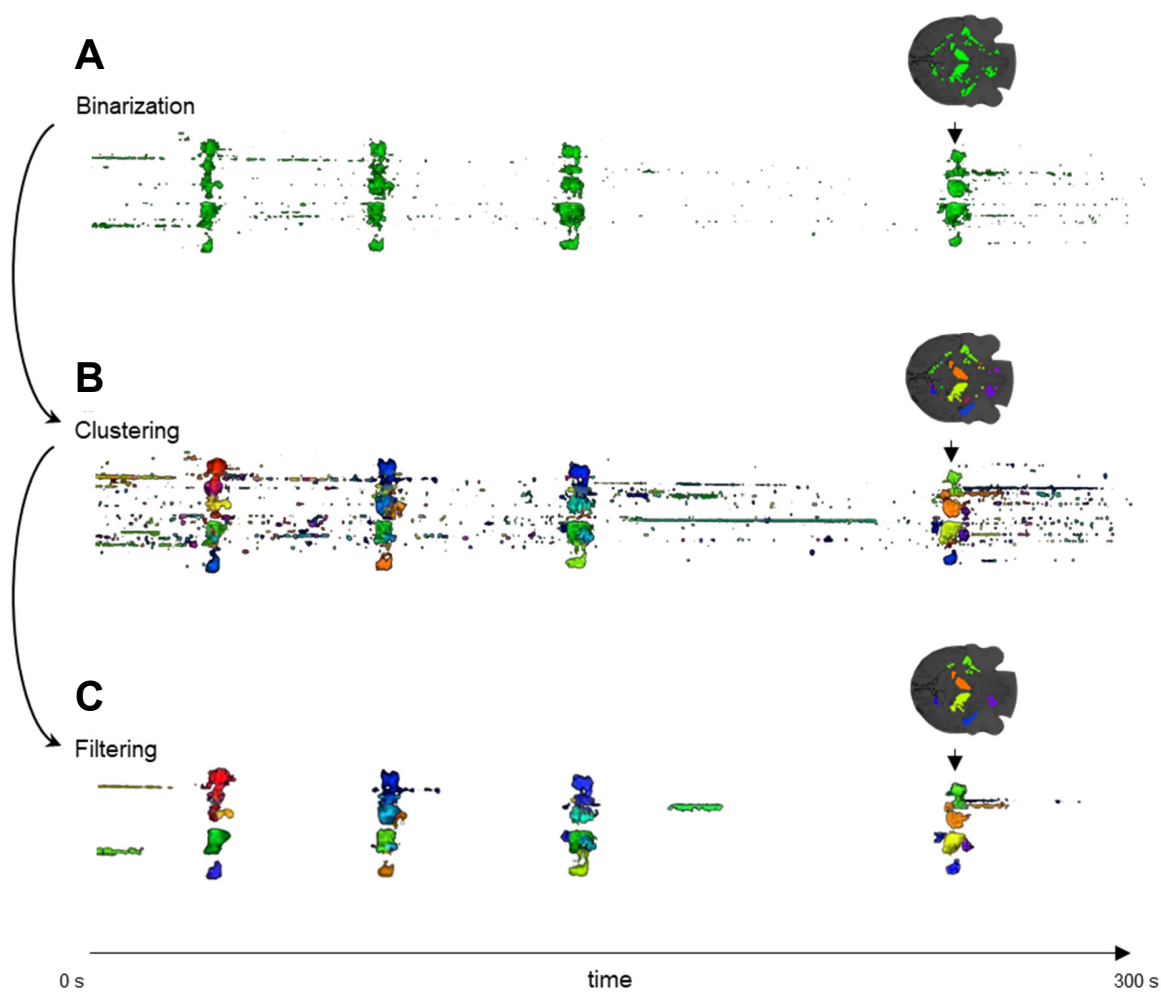

**Fig. S7 Volume identification.** (A) X,Y,T representation of the binarized Ca<sup>2+</sup> fluctuations. (B) The binarized stack is clustered according to the proximity of voxels and each separate cluster is labelled in different colors. Each cluster is characterized by measured set of metrics: x,y,t volume, the surface of the x,y projection, the temporal duration. (C) By setting different dimensional thresholds it is possible to analyze just a sub-cluster of volumes. Here, are represented only the clusters larger than 300 voxels
