# Supplementary material for: Evolution of Epileptiform Activity in Zebrafish by Statistical-Based Integration of Electrophysiology and 2-Photon Ca2+ Imaging
Source: MDPI journal article supplement (doi:10.3390/cells9030769), 2020-03-21
Supplement: s1 [file s1]

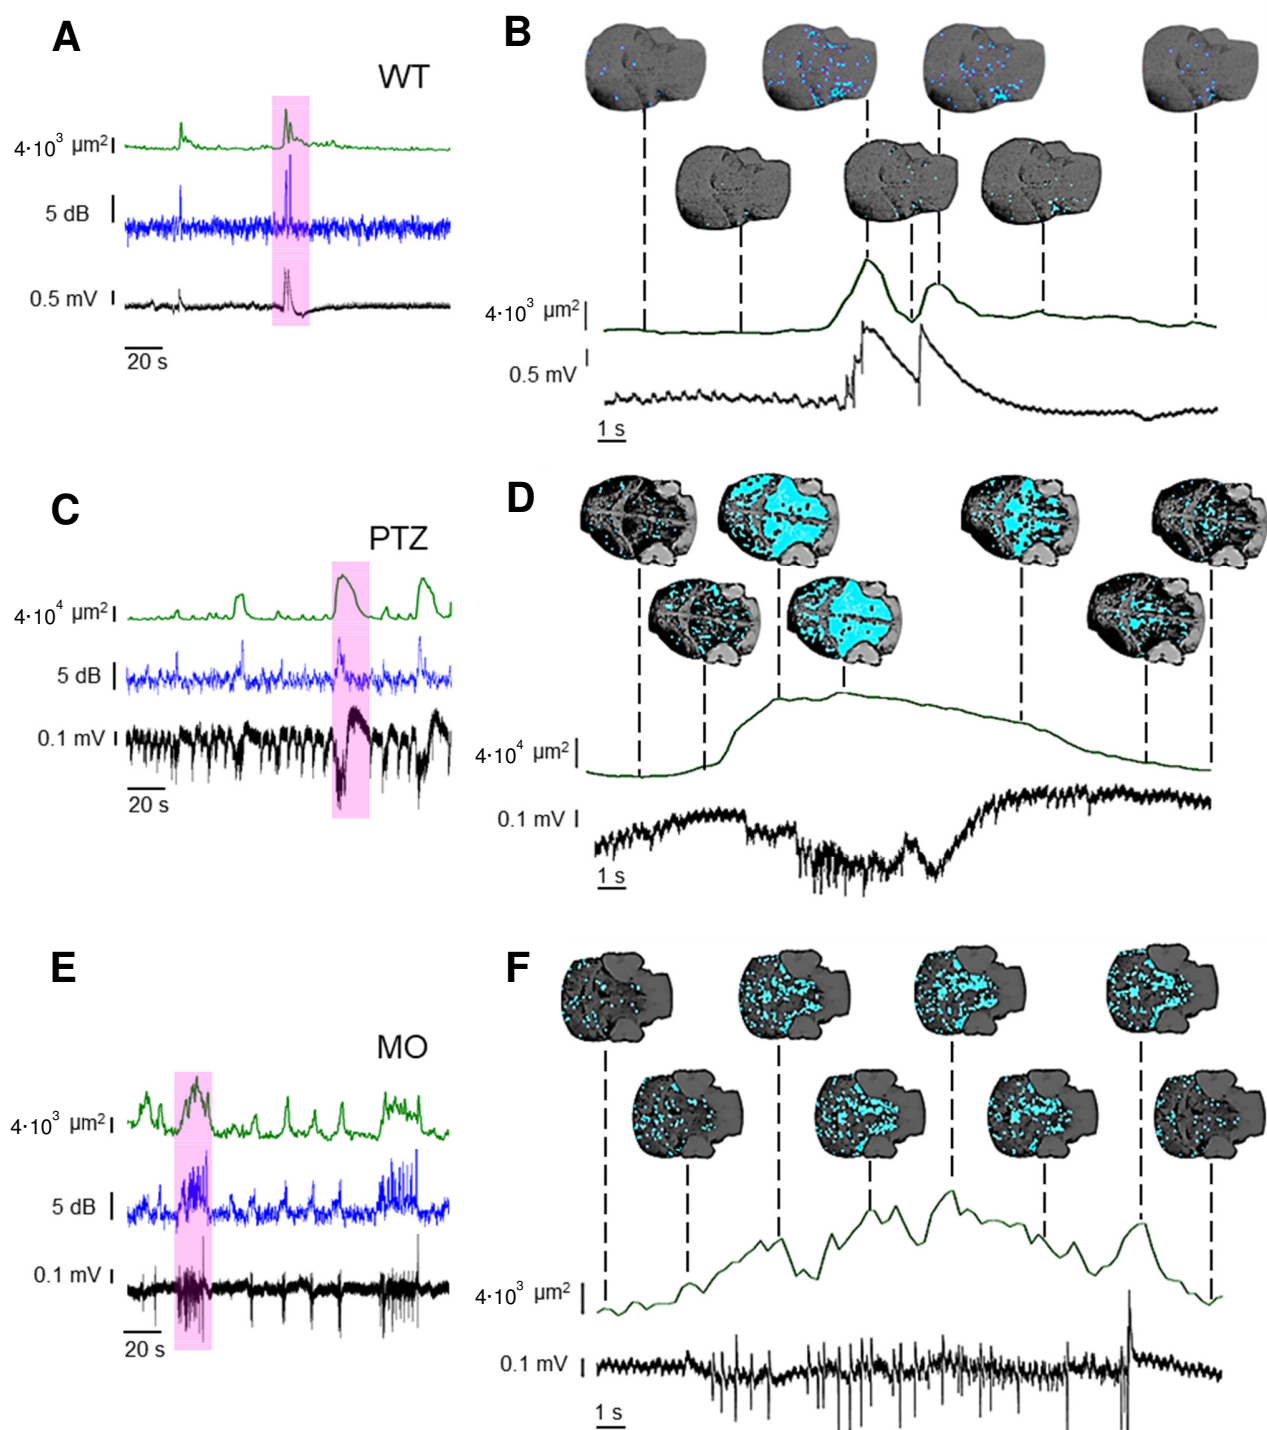

**Fig. S6 Spatio-temporal evolution of the recruitment of high Ca<sup>2+</sup> domains in the three experimental groups.** (A) Representative recordings from control zebrafish. The green trace represents the temporal evolution of activity recruitment expressed as the surface of the high Ca<sup>2+</sup> domains measured on the whole brain area. The blue trace reports the RMS power measured in the 30-95 Hz band. The black trace reports the raw LFP recording. Panels C and E show representative recordings for the PTZ treated larva (C) and for the *kcn10ja* morphants (E). (B, D, F) Magnification of the events highlighted in magenta in the traces on the left. Selected frames represent the recruited area (light blue pixels) aligned with the underlying traces.
