# Supplementary material for: Evolution of Epileptiform Activity in Zebrafish by Statistical-Based Integration of Electrophysiology and 2-Photon Ca2+ Imaging
Source: MDPI journal article supplement (doi:10.3390/cells9030769), 2020-03-21
Supplement: s1 [file s1]

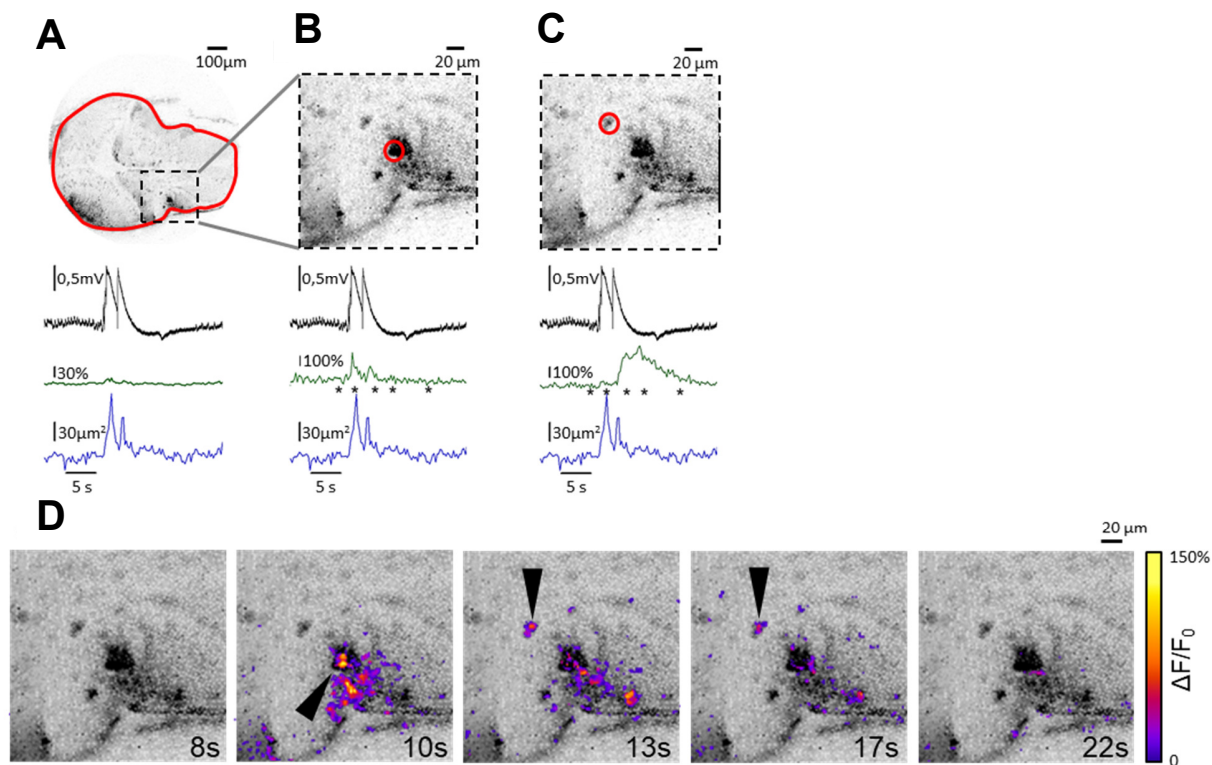

**Fig. S4 Activity and motion.** (A, B, C) Alignment of LFP (black),  $\text{Ca}^{2+}$  (green) and motion (blue) traces. The  $\text{Ca}^{2+}$  fluctuations have been averaged on the red regions displayed in the three panels. In panel A, the  $\text{Ca}^{2+}$  fluctuations are measured on the whole brain section. In panels B and C the  $\text{Ca}^{2+}$  fluctuations are measured on two different single neurons (red circles) that show motion-correlated activity. (D)  $\Delta F/F_0$  images showing specific temporal points (\*) of calcium traces in B and C.
