# Supplementary material for: Evolution of Epileptiform Activity in Zebrafish by Statistical-Based Integration of Electrophysiology and 2-Photon Ca2+ Imaging
Source: Cells. 2020 Mar 21;9(3):769. doi: 10.3390/cells9030769 (PMC7140665; doi:10.3390/cells9030769)
Supplement: Supplementary file 1 [file cells-09-00769-s001.zip]

Archive with 19 entries (17 files):
- supplementary figures/
- supplementary figures/Figure S1.pdf
- supplementary figures/Figure S2.pdf
- supplementary figures/Figure S3.pdf
- supplementary figures/Figure S4.pdf
- supplementary figures/Figure S5.pdf
- supplementary figures/Figure S6.pdf
- supplementary figures/Figure S7.pdf
- supplementary figures/Figure S8.pdf
- supplementary figures/Figure S9.pdf
- supplementary movies/
- supplementary movies/Video S1.mov
- supplementary movies/Video S2.mov
- supplementary movies/Video S3.mov
- supplementary movies/Video S4.mov
- supplementary movies/Video S5.mov
- supplementary movies/Video S6.mov
- supplementary movies/Video S7.mov
- supplementary movies/Video S8.mov
